# Supplementary material for: Complement C3a signaling facilitates skeletal muscle regeneration by regulating monocyte function and trafficking
Source: PubMed Central journal article supplement (PMC5727192; doi:10.1038/s41467-017-01526-z), 2017-12-12
Supplement: 41467_2017_1526_MOESM1_ESM.pdf [file 41467_2017_1526_MOESM1_ESM.pdf]

**Complement C3a signaling facilitates skeletal muscle regeneration by regulating monocyte function and trafficking**

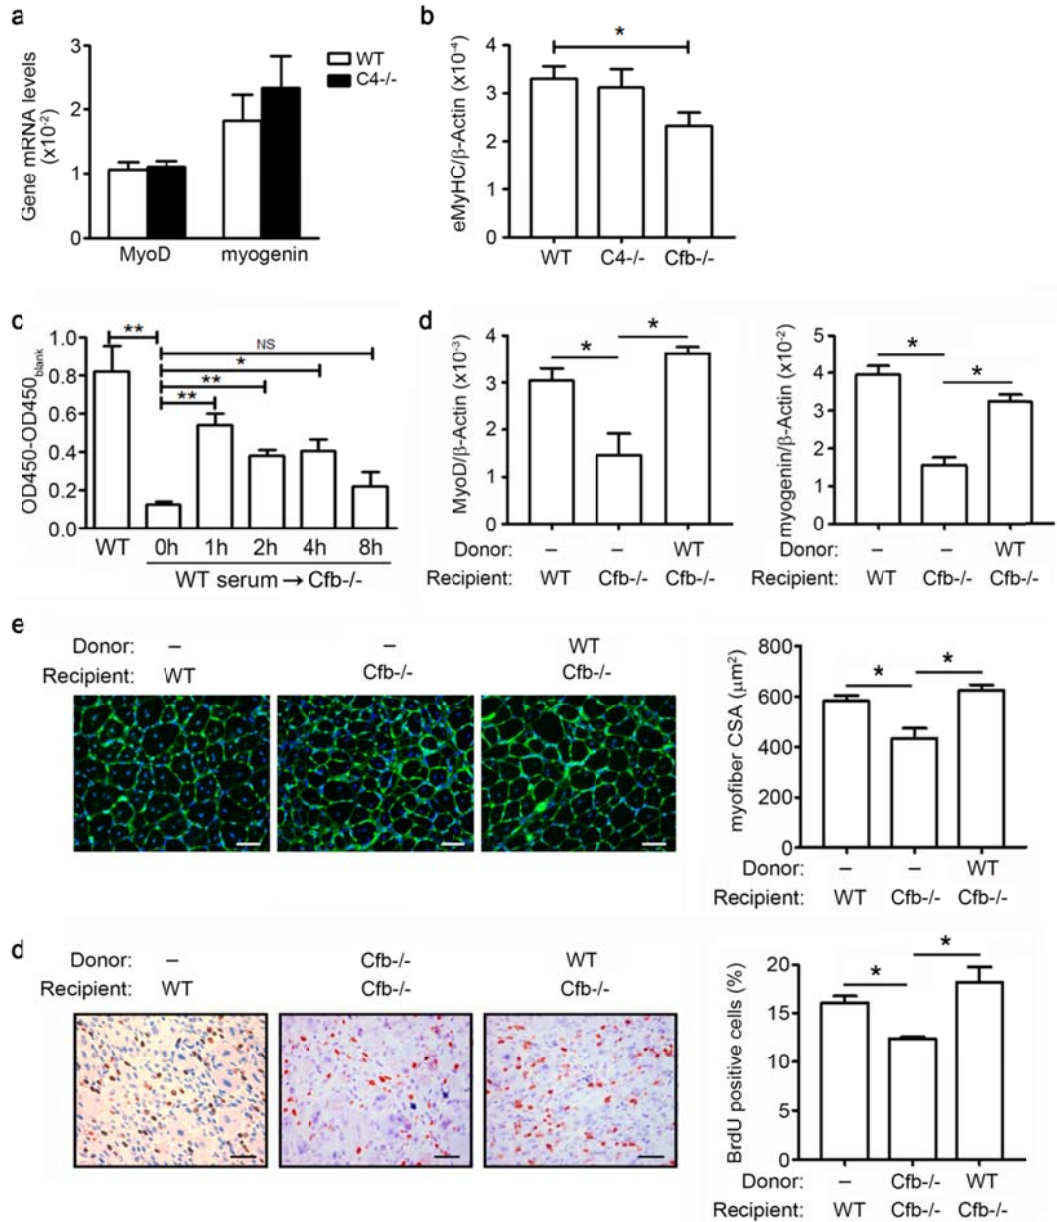

**Supplementary Figure 1. Complement alternative activation is critical for muscle regeneration.**

a. At day 5 after injury, the mRNA expression levels of MyoD and myogenin in WT and C4<sup>-/-</sup> muscle were assessed by realtime-PCR (N=4 in each group).

b. the mRNA expression levels of eMyHC in WT, Cfb<sup>-/-</sup> and C4<sup>-/-</sup> muscle were assessed by realtime-PCR (N=4 in each group).

c. WT mouse serum were injected to Cfb<sup>-/-</sup> mouse by intravenous, the recipient Cfb<sup>-/-</sup> mouse serum were collected at 1, 2, 4, 8 hours, then ELISA assay for LPS-dependent alternative pathway complement activity was performed.

d. At day 5 after CTX injury, the mRNA expression levels of MyoD and myogenin were assessed by realtime-PCR (N=4 in each group).

e. At day 15 after CTX injury, the mean myofiber cross section area (CSA) in injured muscles from WT mice, *Cfb*<sup>-/-</sup> mice and *Cfb*<sup>-/-</sup> mice with WT serum were measured. (N=4 in each group; bars, 50  $\mu$ m)

f. BrdU immunohistochemical staining was used to detect the proliferating cells in injured muscle (at day 5 after injury) of WT mice, *Cfb*<sup>-/-</sup> mice and *Cfb*<sup>-/-</sup> mice with WT serum, the percentages of BrdU positive cell per field were analyzed. (N=4 in each group; bars, 50  $\mu$ m).

Data are expressed as the mean  $\pm$  s.e.m. \*P<0.05 ,\*\* P<0.01, unpaired t-test, two-tailed.

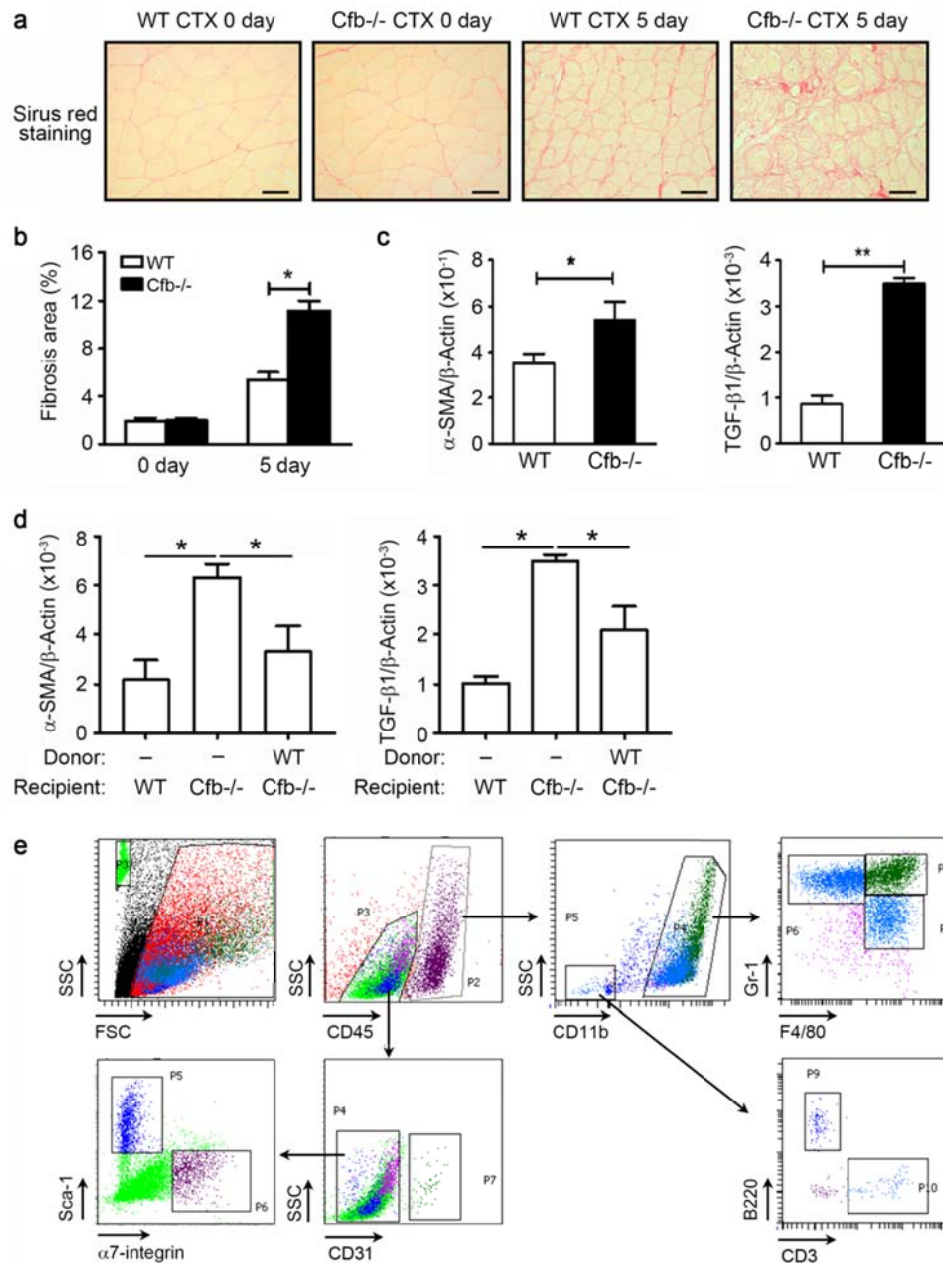

**Supplementary Figure 2. Alternative pathway deficiency increases muscle fibrosis after injury,**

a. Sirius red staining was used to detect the collagen deposition (Red colour) in muscle (at day 0 and day 5 after injury) of WT and *Cfb*<sup>-/-</sup> mice. (N=4; bars, 50 μm)

b. The percentages of Sirius red staining positive area per field were analyzed. (N=4 in each group)

c. At day 5 after CTX injury, the mRNA expression levels of α-SMA and TGF-β1 in WT and *Cfb*<sup>-/-</sup> muscle were assessed by realtime-PCR (N=4 in each group).

d. At day 5 after CTX injury, the mRNA expression levels of α-SMA and TGF-β1 in WT, *Cfb*<sup>-/-</sup> and *Cfb*<sup>-/-</sup> with WT serum muscle were assessed by realtime-PCR (N=4 in each group).

e. FACS gating strategies. By anti-CD45 staining, cells were gated to CD45 positive bone marrow derived cells and CD45 negative muscle resident cells. Then by anti-CD11b, anti-CD3 and anti-B220 staining, cells in CD45 positive gate was divided into CD11b<sup>+</sup> monocytes cells, CD3<sup>+</sup> T cells and

B220<sup>+</sup> B cells. The cells in CD11b positive gate were further divided into Gr1<sup>+</sup>F4/80<sup>-</sup> neutrophils, Gr1<sup>hi</sup>F4/80<sup>+</sup> pro-inflammatory macrophages and Gr1<sup>low</sup>F4/80<sup>+</sup> anti-inflammatory macrophages. By anti-CD31, anti-Sca-1 and anti- $\alpha$ 7-integrin staining, cells in CD45 negative cells were divided into CD31<sup>+</sup> endothelia cells, CD31<sup>-</sup>Sca-1<sup>+</sup> fibro/adipogenic progenitors and CD31<sup>-</sup> $\alpha$ 7-integrin<sup>+</sup> myoblast. Data are expressed as the mean  $\pm$  s.e.m. \*P<0.05, \*\*P<0.01, unpaired t-test, two-tailed.

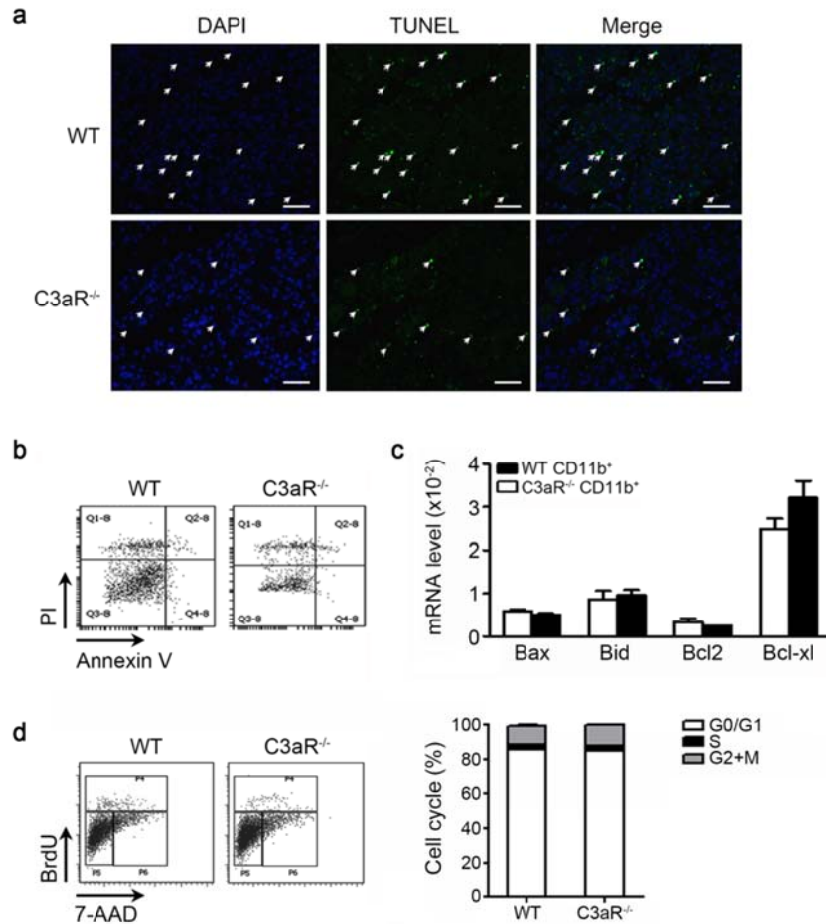

**Supplementary Figure 3. C3aR deficiency dose not affect the proliferation and apoptosis of macrophages.**

a. TUNEL staining was used to detect the apoptosis cells (green) in injured muscle (at day 3 after injury) of WT and *C3aR*<sup>-/-</sup> muscle, the nuclei were counter stained with DAPI (blue). (Bars, 50  $\mu$ m).

b. At 3 days after CTX injury, the CD45<sup>+</sup>F4/80<sup>+</sup> macrophages was gated, then Annexin V and PI analysis was used to detect the apoptosis ratio of WT and *C3aR*<sup>-/-</sup> macrophages.( N=3 in each group)

c. The mRNA expression levels of apoptosis associated gene Bax, Bid, Bcl2, Bcl-xl in sorted WT and *C3aR*<sup>-/-</sup> macrophages at 1 day after injury were accessed by realtime-PCR.( N=3 in each group)

d. The cell cycle of macrophages in WT and *C3aR*<sup>-/-</sup> muscle at day 2 after injury was accessed by BrdU staining. The macrophages was gated in CD45<sup>+</sup>CD11b<sup>+</sup>F4/80<sup>+</sup> cells.

Data are expressed as the mean  $\pm$  s.e.m. \*P<0.05, unpaired t-test, two-tailed.

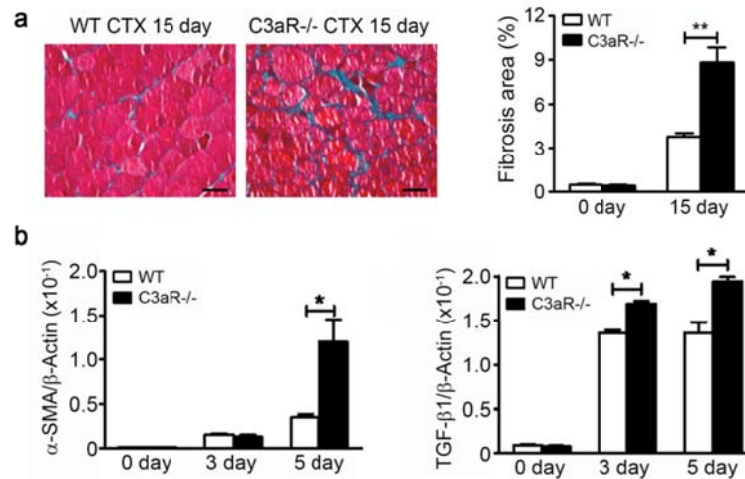

**Supplementary Figure 4. Muscle fibrosis is increased in C3aR deficiency mouse.**

a. Masson staining was used to detect the collagen deposition (green colour) in muscle (at day 15 after injury) of WT and *C3aR*<sup>-/-</sup> mice, the percentages of fibrosis area per field were analyzed. (Bars, 50  $\mu$ m; N=4 in each group)

b. At 0, 3, 5 days after CTX injury, the mRNA expression levels of MyoD and myogenin in WT and *C3aR*<sup>-/-</sup> were assessed by realtime-PCR (N=4 in each group).

Data are expressed as the mean  $\pm$  s.e.m. \*P<0.05, unpaired t-test, two-tailed.

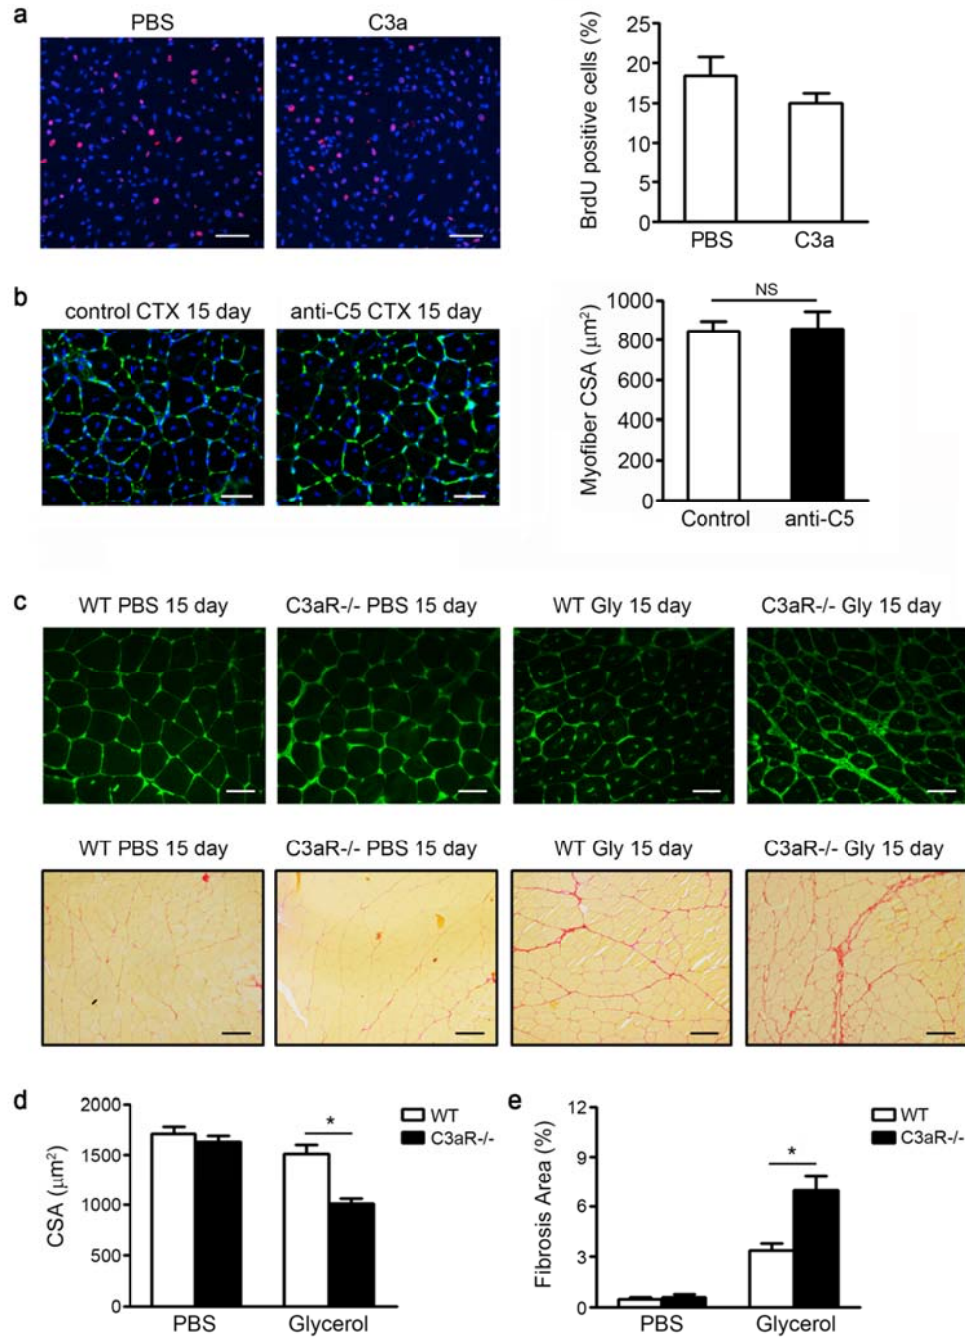

**Supplementary Figure 5. Complement receptor C3aR deficiency impairs muscle regeneration.**

a. The proliferation ratio of myoblast with or without C3a ( $10\text{ng ml}^{-1}$ ) stimulation was detected by BrdU staining. (Bars,  $100\ \mu\text{m}$ ,  $N=6$  in each group)

b. The anti-C5 monoclonal antibody and IgG control antibody was injected to WT mice ( $1\text{mg/mice}$ ) by i.p.. At 15 day after CTX injury, muscle was immune-stained with WGA (green), the nuclei were counter stained with DAPI (blue) (Bars,  $50\ \mu\text{m}$ ); The mean myofiber cross section area (CSA) in injured muscles from IgG and anti-C5 muscle were measured. ( $N=4$  in each group)

c. At 15 day after glycerol injury, the regeneration and fibrosis in WT and *C3aR*<sup>-/-</sup> muscle were examined by WGA staining (up panel; bars,  $50\ \mu\text{m}$ ) and Sirius Red staining (lower panel; bars,  $100\ \mu\text{m}$ ).

d. Graph was the statistics of myofiber mean CSA,  $\sim 250$  myofiber per muscle ( $N=4$  in PBS group,  $N=6$

in Glycerol group)

e. Graph was the percentages of fibrosis area per field in WT and *C3aR*<sup>-/-</sup> muscle. (N=4 in PBS group, N=6 in glycerol group)

Data are expressed as the mean  $\pm$  s.e.m. \*P<0.05, unpaired t-test, two-tailed.



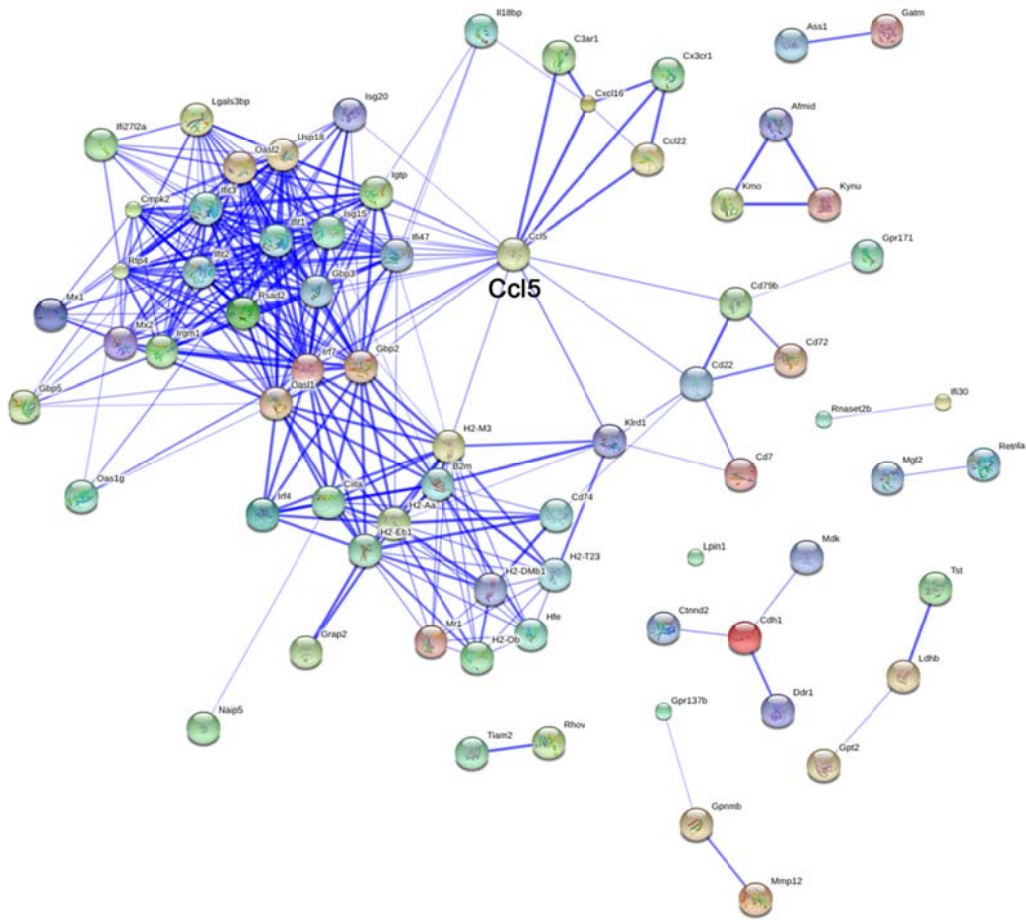

**Supplementary Figure 6.** The interaction network of down regulated genes in C3aR-/- macrophages is analyzed by STRING software.

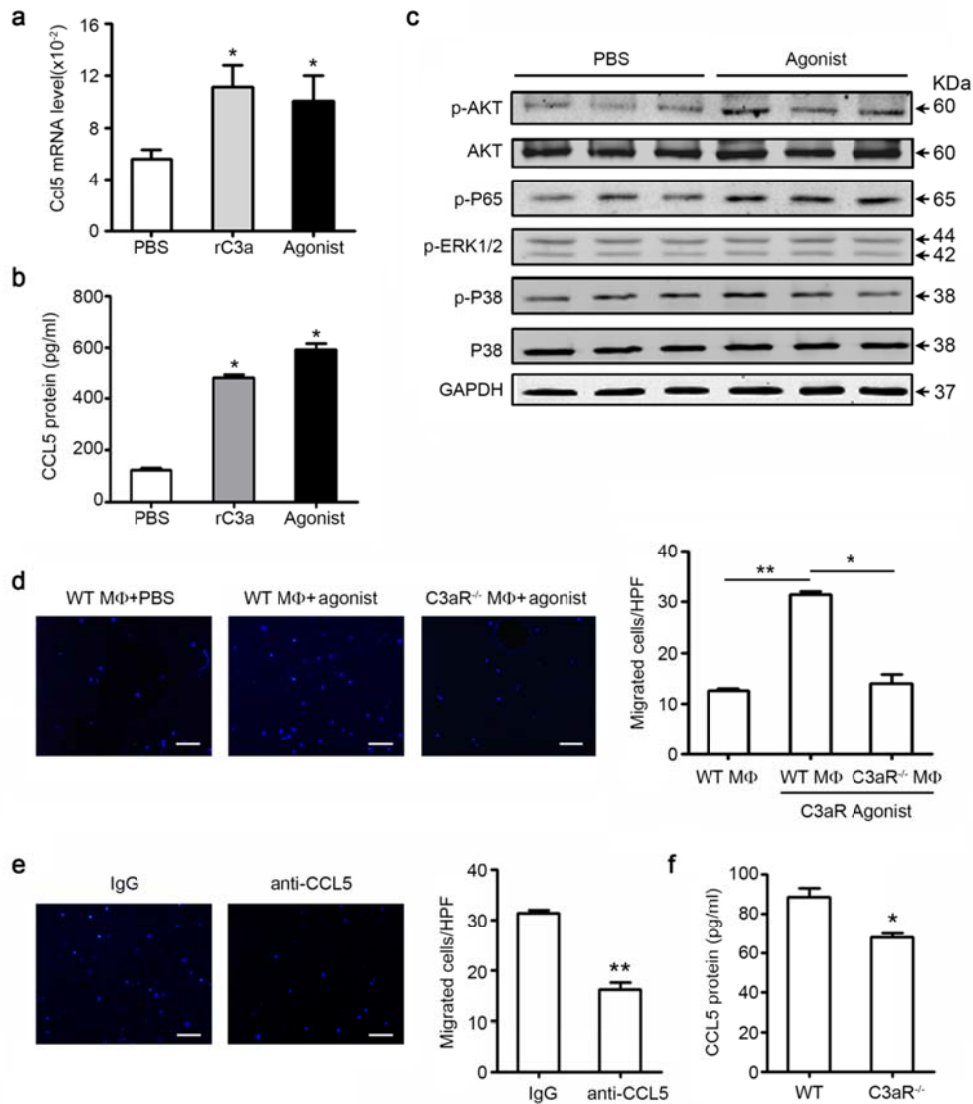

**Supplementary Figure 7. C3a-C3aR pathway promotes the recruitment of macrophage by CCL5.**

a. the mRNA levels of CCL5 in PBS, recombinant C3a (1ug/mL), C3aR agonist (1μM) stimulated macrophages were accessed by realtime-PCR. (N=4 in each group)

b. CCL5 ELISA assay was used to detect the concerntration of CCL5 in supernatant of PBS, recombinant C3a, C3aR agonist stimulated macrophages. (N=4 in each group)

c. The phosphorylation level of AKT, NF-κBp65 subunit, ERK1/2, MAPK p38 subunit in PBS or C3aR agonist stimulated macrophages (30min) was accessed by Western blot. (N=3 in each group)

d. WT or *C3aR*<sup>-/-</sup> bone marrow derived monocytes (5x10<sup>5</sup>/well) with or without C3aR agonist (1μM) stimulation were seeded in the lower chamber and WT monocytes (5x10<sup>4</sup>/well) were seeded in the upper chamber. 12 hours after co-culture, migrated cells from upper chamber were counted by DAPI staining (blue). (Bars, 50 μm, 10 filed was collected per sample, N=4 in each group.)

e. WT bone marrow derived monocytes (5x10<sup>5</sup>/well) with C3aR agonist (1μM) stimulation were seeded in the lower chamber , CCL5 neutralization antibody(N=4) and IgG antibody (N=4) was added

in the supernatant, and WT monocytes ( $5 \times 10^4$ /well) were seeded in the upper chamber. 12 hours after co-culture, migrated cells from upper chamber were counted by DAPI staining (blue). (Bars, 50  $\mu$ m, 10 filed was collected per sample)

f. CCL5 concentration in the supernatant of WT (N=8) and *C3aR*<sup>-/-</sup> (N=4) muscle extract at day 1 after CTX injury was detected by CBA flex.

Data are expressed as the mean  $\pm$  s.e.m. \*P<0.05, \*\* P<0.01, unpaired t-test, two-tailed.

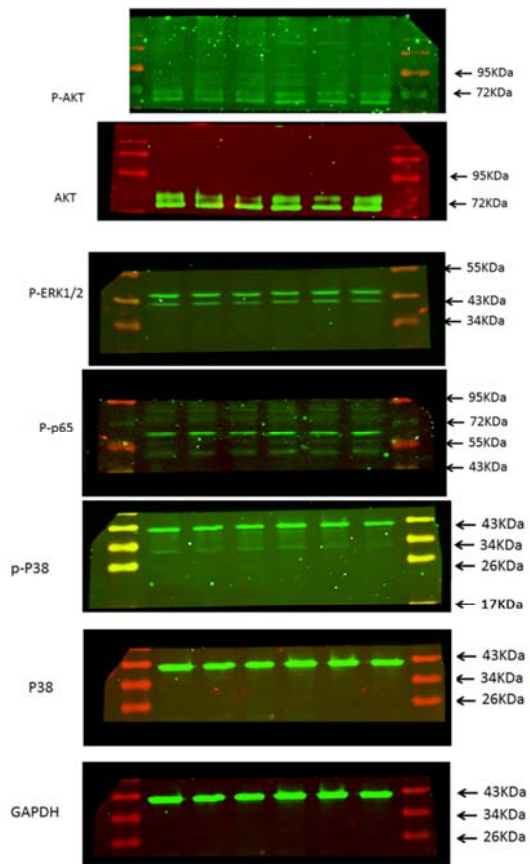

Supplementary Figure 8

Supplementary Figure 8. Uncropped Western blot scans of Supplementary Figure 7c.

**Supplementary Table 1:****List of antibodies used in this study**

| Antibodies                                               | Isotype          | Dilution | Source                    |
|----------------------------------------------------------|------------------|----------|---------------------------|
| IHC and IF antibodies                                    |                  |          |                           |
| BrdU (Clone: BU-33)                                      | Mouse monoclonal | 1:2000   | Sigma                     |
| C3b/iC3b (Clone:3/26)                                    | Mouse monoclonal | 1:50     | Hycult Biotech            |
| Western Blot antibodies                                  |                  |          |                           |
| Phospho-Akt (Ser473) (D9E)                               | Rabbit mAb       | 1:1000   | Cell Signaling Technology |
| Akt (pan) (11E7)                                         | Rabbit mAb       | 1:1000   | Cell Signaling Technology |
| Phospho-NF- $\kappa$ B p65 (Ser468)                      | Rabbit mAb       | 1:1000   | Cell Signaling Technology |
| Phospho-p38 MAPK (Thr180/Tyr182) (D3F9)                  | Rabbit mAb       | 1:1000   | Cell Signaling Technology |
| p38 MAPK (D13E1)                                         | Rabbit mAb       | 1:1000   | Cell Signaling Technology |
| Phospho-p44/42 MAPK (Erk1/2) (Thr202/Tyr204) (D13.14.4E) | Rabbit mAb       | 1:1000   | Cell Signaling Technology |
| GAPDH (D4C6R)                                            | Mouse mAb        | 1:1000   | Cell Signaling Technology |
| Flow cytometry antibody                                  |                  |          |                           |
| Antibody                                                 | Isotype          | Dilution | Source                    |
| CD45 Percp Cy5.5(Clone:104)                              | Rat anti mouse   | 1:100    | BD                        |
| CD11b APC Cy7(Clone:M1/70)                               | Rat anti mouse   | 1:100    | BD                        |
| F4/80 PE(Clone:BM8)                                      | Rat anti mouse   | 1:100    | BD                        |
| Gr-1 FITC(Clone:R86-8C5)                                 | Rat anti mouse   | 1:100    | BD                        |
| CD3 PE-CF594(Clone:145-2C11)                             | Rat anti mouse   | 1:100    | BD                        |
| B220 APC (Clone: RA3-6B2)                                | Rat anti mouse   | 1:100    | BD                        |
| CD31 FITC(Clone:MEC13.3)                                 | Rat anti mouse   | 1:100    | BD                        |
| Sca-1 PE-Cy7(Clone:D7)                                   | Rat anti mouse   | 1:100    | BD                        |
| $\alpha$ 7-integrin APC (Clone: 334908)                  | Rat anti mouse   | 1:10     | R&D                       |
| FITC Annexin V Apoptosis Detection Kit II (Cat: 556570)  |                  |          | BD                        |
| APC BrdU Flow Kit (Cat: 552598)                          |                  |          | BD                        |
| Secondary antibodies                                     |                  |          |                           |
| Antibody                                                 | Conjugate        | Dilution | Source                    |
| Rabbit polyclonal anti-mouse IgG                         | Alexa 488        | 1:1000   | Cell Signaling Technology |

**Supplementary Table 2:****List of primers used for qRT-PCR in this study**

| Gene          | Accession Number | Forward primer               | Reverse primer                |
|---------------|------------------|------------------------------|-------------------------------|
| C3aR          | NM_009779        | 5'-CCCCAAGACATTGCCTCCAT-3'   | 5'-GACTGTGTTCACGGTCGTCT-3'    |
| C5aR          | NM_007577        | 5'-TCCTTCAGAAGAGTTGCCTGC-3'  | 5'-TTCTGTGGTAACCAGCGACG-3'    |
| MyoD          | NM_010866.2      | 5'-AGCATAGTGGAGCGCATCTC-3'   | 5'-GGTCTGGGTTCCCTGTTCTG-3'    |
| Myogenin      | NM_031189.2      | 5'-CAGCCCAGCGAGGGAATTA-3'    | 5'-AGAAGCTCCTGAGTTTGCCC-3'    |
| $\alpha$ -SMA | NM_007392        | 5'-TAACCCTTCAGCGTTCAGCC-3'   | 5'-ACATAGCTGGAGCAGCGTCT-3'    |
| TGFb1         | NM_011577.1      | 5'-GTCACTGGAGTTGTACGGCA-3'   | 5'-AGCCCTGTATTCCGTCTCT-3'     |
| eMHC          | NM_001099635.1   | 5'-CTCTGTACAGTCAGAGGTGT-3'   | 5'-TTCCGACTTGCAGGAAAG-3'      |
| CD45          | NM_011210        | 5'-CCTACACCCAGTGATGGTGC-3'   | 5'-TTGTGCTTGGAGGGTCAGTG-3'    |
| F4/80         | NM_008401        | 5'-CTGTGGACATGGACGCTGAT-3'   | 5'-GAGGCAAGGGACACACTGAC-3'    |
| IL-1 $\beta$  | NM_008361        | 5'-CGTGGACCTTCCAGGATGAG-3'   | 5'-CATCTCGGAGCCTGTAGTGC-3'    |
| IL-6          | NM_031168.1      | 5'-GGTGACAACCACGGCCTTCCC     | 5'-AAGCCTCCGACTTGTGAAGTGGT-3' |
| CCL2          | NM_011333        | 5'-GCACCAGCACCACTTCT-3'      | 5'-GCAGGCCAGAACATGACAGG-3'    |
| CCL3          | NM_011337        | 5'-CTTGGAGGCAGCGAGGAACCC-3'  | 5'-AGCCCCTGCTCTACACGGGA-3'    |
| CCL5          | NM_013653.3      | 5'-TGCTCCAATCTGCAGTCGT-3'    | 5'-TCTTCTCTGGGTTGGCACAC-3'    |
| CXCL9         | NM_008599.4      | 5'-CCAAGCCCCAATTGCAACAA-3'   | 5'-AGTCCGGATCTAGGCAGGTT-3'    |
| CXCL16        | NM_023158.6      | 5'-CAAGACCCTAGCGCTACAG-3'    | 5'-TCACTGATGGAGACGAGCCT-3'    |
| CD74          | NM_010545.3      | 5'-GGCTCCACCTAAAGAGCCAC-3'   | 5'-GGGTGACTTGACCCAGTTC-3'     |
| H2-Ab1        | NM_207105.3      | 5'-GTGTACCAGTTCATGGGCGA-3'   | 5'-ACGTACTCCTCCCGTTGTA-3'     |
| H2-Aa         | NM_010378.2      | 5'-AGACACCAGGGCCTTATG-3'     | 5'-GAAGAGGGACACACGCCTTC-3'    |
| H2-T23        | NM_010398.3      | 5'-CCTGGACCGGAATGACATA-3'    | 5'-GACTGCCTCTGACTTGTGCT-3'    |
| CD22          | NM_009845.3      | 5'-GCCCTTAAATTGATCCGTCAGG-3' | 5'-CATGGTGTCTCGTCTGGGTG-3'    |
| F11r          | NM_172647.2      | 5'-AGCCAGATCACAGCTCCCTA-3'   | 5'-CATGTCTTCCGGGTCACA-3'      |
| Cdh1          | NM_009864.2      | 5'-AACCCAAGCACGTATCAGGG-3'   | 5'-GAGTGTGGGGGCATCATCA-3'     |
| Bax           | NM_007527.3      | 5'-TGCTAGCAAAGTGGTCTCA-3'    | 5'-CACGGAGGAAGTCCAGTGTC-3'    |
| Bid           | NM_007544.3      | 5'-TCGCCAAATAGGCGATGAG-3'    | 5'-GGGAAGGCTGTCTTCACCTC-3'    |
| Bcl2          | NM_009741.4      | 5'-AACATCGCCCTGTGGATGAC-3'   | 5'-AAACAGAGGTCGCATGCTGG-3'    |
| Bcl-xL        | NM_009743.4      | 5'-AGTAAACTGGGGTCGCATCG-3'   | 5'-GCCATCCAACTTGCAATCCG-3'    |
| GAPDH         | NM_008084        | 5'-CATGGCCTTCCGTGTTCCCTA-3'  | 5'-GCGGCACGTCAGATCCA-3'       |
